# Supplementary material for: Growth factors regulate phospholipid biosynthesis in human fibroblast-like synoviocytes obtained from osteoarthritic knees
Source: PubMed Central journal article supplement (PMC5647370; doi:10.1038/s41598-017-14004-9), 2017-10-18
Supplement: 41598_2017_14004_MOESM1_ESM.pdf [file 41598_2017_14004_MOESM1_ESM.pdf]

## Supplementary Informations

### **Growth factors regulate phospholipid biosynthesis in human fibroblast-like synoviocytes obtained from osteoarthritic knees**

Katarzyna D. Sluzalska<sup>1</sup>, Gerhard Liebisch<sup>2</sup>, Jochen Wilhelm<sup>3</sup>, Bernd Ishaque<sup>1</sup>, Holger Hackstein<sup>4</sup>, Gerd Schmitz<sup>2</sup>, Markus Rickert<sup>1</sup>, & Juergen Steinmeyer<sup>1\*</sup>

<sup>1</sup>Katarzyna D. Sluzalska, MSc, Bernd Ishaque, MD, Markus Rickert, MD, and Juergen Steinmeyer, PhD: Laboratory for Experimental Orthopaedics, Department of Orthopaedics, Justus Liebig University Giessen, Germany

<sup>2</sup>Gerhard Liebisch, PhD, Gerd Schmitz, MD: Department of Clinical Chemistry and Laboratory Medicine, University Hospital Regensburg, Germany

<sup>3</sup>Jochen Wilhelm, PhD: Medical Clinic II/IV, Justus-Liebig-University, Giessen, Germany

<sup>4</sup>Holger Hackstein, MD: Institute for Clinical Immunology and Transfusion Medicine, Justus Liebig University Giessen, Germany

| <b>Treatment</b>  | <b>[D9]-PC<br/>[nmol/mg]</b> | <b>[D4]-PE<br/>[nmol/mg]</b> | <b>[D4]-PE P<br/>[nmol/mg]</b> | <b>[D9]-SM<br/>[pmol/mg]</b> | <b>[D9]-LPC<br/>[pmol/mg]</b> |
|-------------------|------------------------------|------------------------------|--------------------------------|------------------------------|-------------------------------|
| <b>control</b>    | 4.31±0.84                    | 2.74±0.50                    | 2.78±0.53                      | 110±20                       | 20±7                          |
| TGF-β1            | <b>5.86±1.16</b>             | 3.02±0.55                    | <b>2.47±0.50</b>               | <b>130±20</b>                | 22±4                          |
| TGF-β1 + SB431542 | <b>4.19±0.82</b>             | 2.56±0.46                    | <b>2.15±0.34</b>               | 120±20                       | 22±4                          |
| IGF-1             | <b>5.06±1.06</b>             | 2.84±0.50                    | 2.39±0.34                      | <b>140±30</b>                | <b>22±4</b>                   |
| IGF-1 + LY294002  | 5.28±1.25                    | 2.63±0.45                    | 2.68±0.31                      | 120±20                       | 24±5                          |
| IGF-1 + SCH772984 | <b>6.07±1.51</b>             | 3.01±0.54                    | 2.35±0.34                      | <b>190±60</b>                | 30±7                          |
| <b>control</b>    | 3.50±0.72                    | 2.07±0.47                    | 2.28±0.46                      | 80±10                        | 20±0                          |
| BMP-2             | 3.85±0.72                    | 2.25±0.69                    | <b>2.36±0.41</b>               | 80±10                        | 20±0                          |
| BMP-4             | 3.81±0.97                    | 2.21±0.51                    | 2.29±0.32                      | 80±20                        | 24±5                          |
| BMP-7             | <b>4.22±0.77</b>             | <b>2.38±0.58</b>             | <b>2.47±0.39</b>               | 90±10                        | 22±4                          |

#### **Supplementary Table 1: Effect of growth factors on the level of newly synthesized PL**

**classes.** The quantitative values obtained from stable isotope-labelled PL classes were normalized with respect to the cellular protein content and expressed as nmol/mg protein or pmol/mg protein. Data are presented as means ± SDs (n=5). Bold data correspond to the significantly altered changes being expressed as %-labelled PL as shown in Figure 1 and Table 1. PC = phosphatidylcholine; PE = phosphatidylethanolamine; PE P = phosphatidylethanolamine-based plasmalogens; SM = sphingomyelin; LPC = lysophosphatidylcholine.

| PL specie | control   |                 | TGF- $\beta$ 1 |                 | IGF-1     |                 |
|-----------|-----------|-----------------|----------------|-----------------|-----------|-----------------|
|           | [pmol/mg] | [% labelled PL] | [pmol/mg]      | [% labelled PL] | [pmol/mg] | [% labelled PL] |
| PC 30:0   | 46±16     | 4.3±1.4         | 73±21          | <b>6.6±1.6</b>  | 56±13     | <b>5.3±1.3</b>  |
| PC 32:0   | 426±105   | 5.7±1.2         | 584±200        | <b>8.6±2.3</b>  | 477±137   | <b>7.0±1.3</b>  |
| PC 34:0   | 59±22     | 5.4±1.5         | 82±36          | <b>8.4±2.4</b>  | 65±27     | <b>6.6±1.5</b>  |
| PC 32:1   | 148±27    | 5.1±0.9         | 267±60         | <b>8.8±2.3</b>  | 193±24    | <b>6.8±1.5</b>  |
| PC 34:1   | 812±142   | 5.3±1.3         | 1189±205       | <b>8.0±2.3</b>  | 1036±120  | <b>7.1±2.0</b>  |
| PC 36:1   | 208±33    | 3.3±0.7         | 255±42         | <b>4.3±0.9</b>  | 230±26    | <b>4.0±1.0</b>  |
| PC 34:2   | 332±58    | 8.0±1.6         | 527±101        | <b>12.4±2.8</b> | 419±67    | <b>10.3±2.3</b> |
| PC 36:2   | 315±27    | 5.2±1.4         | 438±64         | <b>7.5±2.1</b>  | 379±52    | <b>6.4±1.7</b>  |
| PC 34:3   | 37±6      | 10.0±2.3        | 74±25          | <b>16.6±3.9</b> | 46±7      | <b>12.5±2.4</b> |
| PC 36:3   | 210±37    | 7.0±1.8         | 309±67         | <b>10.6±2.6</b> | 254±72    | <b>9.1±2.8</b>  |
| PC 38:3   | 78±25     | 4.3±1.0         | 88±24          | <b>5.4±1.1</b>  | 87±22     | <b>5.6±1.2</b>  |
| PC 36:4   | 350±122   | 5.9±0.7         | 435±145        | <b>8.3±0.9</b>  | 428±167   | <b>7.8±1.3</b>  |
| PC 38:4   | 448±182   | 4.6±0.8         | 506±194        | <b>5.9±0.8</b>  | 479±190   | <b>5.7±0.9</b>  |
| PC 40:4   | 35±12     | 6.3±1.6         | 39±12          | <b>8.3±2.0</b>  | 33±9      | <b>7.6±1.6</b>  |
| PC 36:5   | 43±12     | 6.5±1.1         | 60±15          | <b>9.8±1.2</b>  | 51±16     | <b>8.9±1.3</b>  |
| PC 38:5   | 282±93    | 6.5±1.2         | 337±105        | <b>9.0±1.3</b>  | 302±105   | <b>8.1±1.5</b>  |
| PC 40:5   | 54±15     | 5.7±1.2         | 62±17          | <b>7.6±1.4</b>  | 51±15     | 6.7±1.5         |
| PC 38:6   | 65±18     | 5.5±1.1         | 83±19          | <b>8.5±1.2</b>  | 68±24     | <b>7.3±1.6</b>  |
| PC 40:6   | 42±15     | 5.6±1.4         | 49±12          | <b>7.6±1.4</b>  | 42±13     | 6.8±1.4         |
| SM 32:1   | 6±1       | 1.3±0.2         | 6±0            | 1.5±0.2         | 6±1       | 1.5±0.3         |
| SM 33:1   | 5±2       | 0.8±0.2         | 5±1            | 0.9±0.2         | 4±1       | 0.8±0.1         |
| SM 34:0   | 5±2       | 0.5±0.2         | 6±2            | 0.7±0.2         | 7±3       | 0.8±0.3         |
| SM 34:1   | 54±10     | 0.4±0.0         | 69±17          | <b>0.5±0.1</b>  | 70±17     | <b>0.5±0.1</b>  |
| SM 34:2   | 5±1       | 1.4±0.2         | 5±1            | 1.5±0.3         | 5±1       | 1.6±0.4         |
| SM 35:2   | 6±1       | 0.8±0.1         | 7±1            | 1.0±0.2         | 9±2       | <b>1.2±0.1</b>  |
| SM 36:1   | 4±2       | 0.3±0.1         | 6±1            | 0.4±0.1         | 7±2       | 0.5±0.1         |
| SM 36:2   | 3±1       | 1.8±0.3         | 4±1            | <b>2.4±0.4</b>  | 3±1       | 2.0±0.3         |
| SM 42:1   | 8±3       | 0.3±0.1         | 8±2            | 0.3±0.1         | 12±2      | <b>0.5±0.1</b>  |
| SM 42:2   | 10±4      | 0.4±0.1         | 16±4           | 0.6±0.2         | 18±6      | <b>0.7±0.1</b>  |

**Supplementary Table 2: The effect of TGF- $\beta$ 1 and IGF-1 on the level of newly synthesized PL species.** The quantitative values obtained for each stable isotope-labelled PL species were normalized with respect to the cellular protein content and expressed as pmol/mg protein. For each PL species the percentage of stable isotope-labelled PL from the total labelled and unlabelled PL was calculated. Data are presented as means  $\pm$  SDs (n = 5). Bold data correspond to significantly elevated changes (expressed as fold increases) as shown in Figure 2 and 3. PC = phosphatidylcholine; SM = sphingomyelin.

| PL<br>specie | control   |              | BMP-2     |                | BMP-4     |              | BMP-7     |                |
|--------------|-----------|--------------|-----------|----------------|-----------|--------------|-----------|----------------|
|              | [pmol/mg] | [% labelled] | [pmol/mg] | [% labelled]   | [pmol/mg] | [% labelled] | [pmol/mg] | [% labelled]   |
| PC 30:0      | 31±6      | 3.0±0.6      | 36±7      | 3.6±0.7        | 36±8      | 3.4±0.8      | 40±9      | 3.8±0.8        |
| PC 32:0      | 321±76    | 4.5±1.1      | 343±66    | 5.1±1.0        | 332±91    | 4.7±1.3      | 377±79    | <b>5.3±0.8</b> |
| PC 34:0      | 39±10     | 3.9±1.1      | 52±13     | <b>5.2±0.7</b> | 47±17     | 4.7±1.9      | 50±12     | 4.9±0.7        |
| PC 32:1      | 116±19    | 4.0±0.8      | 125±18    | 4.5±0.9        | 127±36    | 4.4±1.0      | 141±24    | <b>4.8±0.7</b> |
| PC 34:1      | 649±130   | 4.4±1.0      | 726±115   | 5.0±1.2        | 724±168   | 4.9±1.3      | 797±100   | <b>5.3±1.2</b> |
| PC 36:1      | 170±41    | 2.7±0.6      | 180±25    | 3.0±0.7        | 183±34    | 3.0±0.9      | 212±20    | <b>3.4±0.8</b> |
| PC 34:2      | 261±41    | 6.7±1.4      | 281±32    | 7.4±1.5        | 287±69    | 7.4±1.7      | 315±39    | <b>7.9±1.2</b> |
| PC 36:2      | 247±33    | 4.4±1.0      | 274±25    | 4.9±1.3        | 268±40    | 4.8±1.3      | 294±24    | <b>5.2±1.2</b> |
| PC 34:3      | 28±6      | 7.9±1.2      | 33±5      | 9.3±1.5        | 32±7      | 9.0±2.0      | 36±7      | 9.7±1.4        |
| PC 36:3      | 161±28    | 5.8±1.3      | 183±31    | 6.7±1.7        | 177±48    | 6.5±1.8      | 197±43    | <b>7.0±1.5</b> |
| PC 38:3      | 69±20     | 4.0±1.0      | 74±20     | 4.3±1.1        | 72±20     | 4.2±0.8      | 81±23     | 4.6±0.8        |
| PC 36:4      | 303±107   | 5.4±0.9      | 326±114   | 6.0±0.8        | 335±142   | 5.9±1.2      | 361±130   | <b>6.3±0.8</b> |
| PC 38:4      | 390±151   | 4.1±0.8      | 427±169   | <b>4.6±0.7</b> | 424±180   | 4.6±0.8      | 462±171   | <b>4.9±0.6</b> |
| PC 40:4      | 29±10     | 5.5±1.3      | 32±10     | 6.1±1.3        | 34±14     | 6.3±2.0      | 37±12     | 6.5±1.2        |
| PC 36:5      | 39±11     | 6.3±1.0      | 44±14     | 6.9±1.0        | 44±16     | 7.1±1.3      | 47±14     | <b>7.2±1.0</b> |
| PC 38:5      | 238±84    | 5.8±1.2      | 266±96    | 6.5±1.3        | 257±102   | 6.4±1.3      | 281±100   | <b>6.8±1.2</b> |
| PC 40:5      | 48±12     | 5.3±0.8      | 52±21     | 5.7±1.6        | 52±19     | 5.8±1.5      | 62±21     | <b>6.6±1.4</b> |
| PC 38:6      | 55±17     | 5.5±1.2      | 65±16     | <b>6.5±1.1</b> | 58±22     | 6.1±1.5      | 70±22     | <b>6.6±1.1</b> |
| PC 40:6      | 33±9      | 4.9±1.0      | 41±14     | 5.9±1.6        | 37±12     | 5.8±1.4      | 45±14     | <b>6.4±1.3</b> |
| SM 32:1      | 5±1       | 1.0±0.2      | 5±0       | 1.1±0.1        | 5±1       | 1.1±0.1      | 5±1       | 1.2±0.3        |
| SM 33:1      | 4±0       | 0.7±0.1      | 4±1       | 0.7±0.1        | 4±1       | 0.7±0.2      | 4±1       | 0.7±0.1        |
| SM 34:0      | 3±2       | 0.3±0.2      | 3±2       | 0.3±0.3        | 2±1       | 0.3±0.1      | 3±2       | 0.3±0.2        |
| SM 34:1      | 38±9      | 0.2±0.0      | 41±5      | 0.3±0.0        | 39±11     | 0.3±0.0      | 44±5      | 0.3±0.1        |
| SM 34:2      | 3±1       | 1.0±0.2      | 3±0       | 1.0±0.1        | 4±0       | 1.2±0.2      | 4±0       | 1.2±0.1        |
| SM 35:2      | 7±2       | 0.8±0.2      | 7±1       | 0.9±0.2        | 7±1       | 0.9±0.3      | 6±1       | 0.8±0.2        |
| SM 36:1      | 4±2       | 0.3±0.1      | 5±2       | 0.4±0.1        | 5±2       | 0.3±0.1      | 4±1       | 0.2±0.01       |
| SM 36:2      | 3±1       | 1.7±0.2      | 2±0       | 1.6±0.3        | 3±1       | 1.8±0.2      | 3±0       | 1.6±0.4        |
| SM 42:1      | 5±0       | 0.2±0.1      | 6±1       | 0.2±0.0        | 6±2       | 0.2±0.1      | 8±2       | <b>0.3±0.1</b> |
| SM 42:2      | 6±4       | 0.2±0.1      | 6±3       | 0.2±0.1        | 8±3       | 0.3±0.1      | 8±3       | 0.3±0.2        |

**Supplementary Table 3: The effect of BMPs on the level of newly synthesized PL species.** The quantitative values obtained for each of the stable isotope-labelled PL species were normalized with respect to the cellular protein content and expressed as pmol/mg protein. For each PL species the percentage of stable isotope-labelled PL from the total labelled and unlabelled PL was calculated. Data are presented as means ± SDs (n = 5). Bold data correspond to the significantly elevated changes (expressed as fold increases) as shown in Figure 4. PC = phosphatidylcholine; SM = sphingomyelin.
